# Supplementary material
Source: MDPI journal article supplement (https://www.mdpi.com/2410-3888/7/4/194)
Supplement: s1 [file s1]

## Supplementary Material

**Table S1.** Temperature (°C) (mean  $\pm$  s.d.) over the experimental period (April-August 2019) in the four treatments: the two levels of temperature control (CT) and high (HT), and the two levels of food availability, high ration (HR), and low ration (LR).

| Month  | Treatment | Temperature (°C)   |
|--------|-----------|--------------------|
| April  | CT+HR     | 15.181 $\pm$ 0.608 |
|        | CT+LR     | 15.777 $\pm$ 1.472 |
|        | HT+HR     | 18.732 $\pm$ 1.481 |
|        | HT+LR     | 18.641 $\pm$ 2.014 |
| May    | CT+HR     | 15.349 $\pm$ 0.560 |
|        | CT+LR     | 15.757 $\pm$ 1.713 |
|        | HT+HR     | 19.183 $\pm$ 1.804 |
|        | HT+LR     | 18.883 $\pm$ 1.427 |
| June   | CT+HR     | 16.258 $\pm$ 0.773 |
|        | CT+LR     | 16.028 $\pm$ 1.571 |
|        | HT+HR     | 19.431 $\pm$ 1.407 |
|        | HT+LR     | 18.964 $\pm$ 1.456 |
| July   | CT+HR     | 16.790 $\pm$ 0.541 |
|        | CT+LR     | 17.286 $\pm$ 0.461 |
|        | HT+HR     | 20.076 $\pm$ 0.628 |
|        | HT+LR     | 19.872 $\pm$ 0.410 |
| August | CT+HR     | 17.210 $\pm$ 0.314 |
|        | CT+LR     | 17.495 $\pm$ 0.448 |
|        | HT+HR     | 20.858 $\pm$ 0.734 |
|        | HT+LR     | 20.527 $\pm$ 1.007 |

**Table S2.** Primer sequences and amplicon size for the genes studied.

| Gene                            | Primer sequences                                                       | Amplicon Size (bp) |
|---------------------------------|------------------------------------------------------------------------|--------------------|
| <i><math>\beta</math>-actin</i> | Fw: 5' - GTGCGTGACATCAAGGAGAAG -3'<br>Rv: 5' - CGAGGAAGGATGGCTGGAA -3' | 178                |
| <i>cyp11b1</i>                  | Fw: 5' - GAGTGGAGCGAGAGGGAAGA -3'<br>Rv: 5' - GATGGCGACGCAGAGAACAG -3' | 142                |
| <i>cyp19a1</i>                  | Fw: 5' - CCGCACAGAGTTCTTCCACA -3'<br>Rv: 5' - CGTCACCAGGATCGACTTCA -3' | 154                |
| <i>20<math>\beta</math>-hsd</i> | Fw: 5' - GAGAAGTACGGAGGGGTGGA -3'<br>Rv: 5' - ACATGTCTCTGGTGGCGAAG -3' | 130                |

*Fw: forward primer; Rv: reverse primer.*

**Table S3.** Aikake's Information Criteria (AIC) model selection for “glmm” with: 1) negative binomial distribution for **Time to Ignore** the observer; 2) gaussian distribution for duration of **Locomotion** behaviours; 3) negative binomial distribution for duration of **Rest** behaviours; 4) negative binomial distribution for the frequency fish **Hide**; 5) negative binomial distribution for the frequency fish show **Aggression**. Temperature refers to Control (CT) or High T°C (HT). Food refers to high ration (HR) or low ration (LR) treatments, day refers to the day of observation (1 to 3). The selected model is shown in bold.

| <b>Time to ignore</b>  |           |                 |
|------------------------|-----------|-----------------|
| <b>Variables</b>       | <b>df</b> | <b>AIC</b>      |
| <b>T° x Food x Day</b> | <b>11</b> | <b>996.541</b>  |
| T° x Food              | 7         | 998.467         |
| T° x Food + Day        | 8         | 1000.411        |
| <b>Locomotion</b>      |           |                 |
| <b>Variables</b>       | <b>df</b> | <b>AIC</b>      |
| T° x Food x Day        | 11        | 1217.586        |
| <b>T° x Food</b>       | <b>7</b>  | <b>1210.926</b> |
| T° x Food + Day        | 8         | 1212.924        |
| <b>Rest</b>            |           |                 |
| <b>Variables</b>       | <b>df</b> | <b>AIC</b>      |

|                   |           |                |
|-------------------|-----------|----------------|
| T° x Food x Day   | 10        | 387.995        |
| <b>T° x Food</b>  | <b>6</b>  | <b>382.274</b> |
| T° x Food + Day   | 7         | 383.608        |
| <b>Hide</b>       |           |                |
| <b>Variables</b>  | <b>df</b> | <b>AIC</b>     |
| T° x Food x Day   | 10        | 642.890        |
| <b>T° x Food</b>  | <b>6</b>  | <b>634.895</b> |
| T° x Food + Day   | 7         | 636.895        |
| <b>Aggression</b> |           |                |
| <b>Variables</b>  | <b>df</b> | <b>AIC</b>     |
| T° x Food x Day   | 10        | 366.253        |
| <b>T° x Food</b>  | <b>6</b>  | <b>360.679</b> |
| T° x Food + Day   | 7         | 361.983        |

**Table S4.** Effect of temperature (control, CT, and high, HT) and food availability (high ration, HR, and low ration, LR) on the gonadosomatic index of males (♂) and females (♀) of two-spotted gobies, *Pomatochistus flavescens*. Bold text indicates significant treatment effects ( $p \leq 0.05$ ) as compared to CT+HR.

| <b>Conditional model - ♂</b> | <b>Estimate</b> | <b>t value</b> | <b>Pr(&gt; t )</b> |
|------------------------------|-----------------|----------------|--------------------|
| CT+LR                        | -0.434          | -2.759         | <b>0.010</b>       |
| HT+HR                        | -0.348          | -2.208         | <b>0.035</b>       |
| HT+LR                        | 0.282           | 1.125          | 0.270              |
| <b>Conditional model - ♀</b> |                 |                |                    |
| CT+LR                        | -1.574          | -1.177         | 0.253              |
| HT+HR                        | 0.052           | 0.048          | 0.963              |
| HT+LR                        | -0.487          | -0.275         | 0.786              |

**Table S5.** Effect of temperature (control, CT, and high, HT) and food availability (high ration, HR, and low ration, LR) on two-spotted goby, *Pomatochistus flavescens* size (SL) and weight (W), after 4 months of exposure to the treatments. Bold text indicates significant treatment effects ( $p \leq 0.05$ ) as compared to CT+HR.

| <b>Conditional model – SL</b> | <b>Estimate</b> | <b>t value</b> | <b>Pr(&gt; t )</b> |
|-------------------------------|-----------------|----------------|--------------------|
| CT+LR                         | -0.293          | -3.580         | <b>&lt;0.001</b>   |
| HT+HR                         | -0.012          | -0.165         | 0.869              |
| HT+LR                         | 0.042           | 0.348          | 0.729              |
| <b>Conditional model - W</b>  |                 |                |                    |
| CT+LR                         | -0.223          | -4.035         | <b>&lt;0.001</b>   |
| HT+HR                         | -0.063          | -1.235         | 0.222              |
| HT+LR                         | 0.103           | 1.265          | 0.211              |

**Table S6** - Effect of Control (CT) and High (HT) temperature treatments on fatty acid profile (% of total FA) of two-spotted goby, *Pomatochistus flavescens*. Bold text indicates significant treatment effects ( $p \leq 0.05$ ) as compared to CT+HR treatment.

| <b>Fatty Acids</b>            | <b>Resid. Dev</b> | <b>F</b> | <b>Pr(&gt;F)</b> |
|-------------------------------|-------------------|----------|------------------|
| <b>Saturated (SFA)</b>        |                   |          |                  |
| 14:0                          | 0.527             | 1.59     | 0.226            |
| 16:0                          | 6.17              | 8.10     | <b>0.012</b>     |
| 18:0                          | 2.88              | 0.04     | 0.837            |
| Other SFA                     | 1.24              | 0.21     | 0.655            |
| $\Sigma$ SFA                  | 10.45             | 5.91     | <b>0.027</b>     |
| <b>Monounsaturated (MUFA)</b> |                   |          |                  |
| 16:1 <i>n</i> -9/ <i>n</i> -7 | 5.57              | 0.03     | 0.865            |
| 18:1 <i>n</i> -9/ <i>n</i> -7 | 288.24            | 0.017    | 0.898            |
| Other MUFA                    | 0.070             | 1.11     | 0.308            |
| $\Sigma$ MUFA                 | 272.14            | 0.02     | 0.903            |
| <b>Polyunsaturated (PUFA)</b> |                   |          |                  |
| 18:2 <i>n</i> -6              | 102.78            | 0.012    | 0.914            |
| 18:3 <i>n</i> -3              | 6.82              | 4.18     | 0.058            |
| 20:4 <i>n</i> -6              | 0.48              | 0.54     | 0.473            |
| 20:5 <i>n</i> -3              | 5.10              | 7.89     | <b>0.013</b>     |
| 22:5 <i>n</i> -3              | 120.60            | 1.09     | 0.312            |
| 22:6 <i>n</i> -3              | 164.77            | 0.88     | 0.363            |
| Other PUFA                    | 197.86            | 0.46     | 0.508            |
| $\Sigma$ PUFA                 | 389.52            | 3.26     | 0.090            |
| $\Sigma$ <i>n</i> -3          | 436.50            | 3.98     | 0.063            |
| $\Sigma$ <i>n</i> -6          | 10.63             | 1.41     | 0.253            |
| <i>n</i> -3/ <i>n</i> -6      | 4.98              | 3.98     | 0.063            |
| <b>Total</b>                  | 673.85            | 3.07     | 0.099            |
